# Supplementary material
Source: PubMed Central journal article supplement (PMC3613427)
Supplement: NIHMS452905-supplement-Supplementary_Information.pdf [file NIHMS452905-supplement-Supplementary_Information.pdf]

Supplementary Information for  
**Structure and mechanism of a pentameric formate channel**

Andrew Waight, James Love and Da-Neng Wang

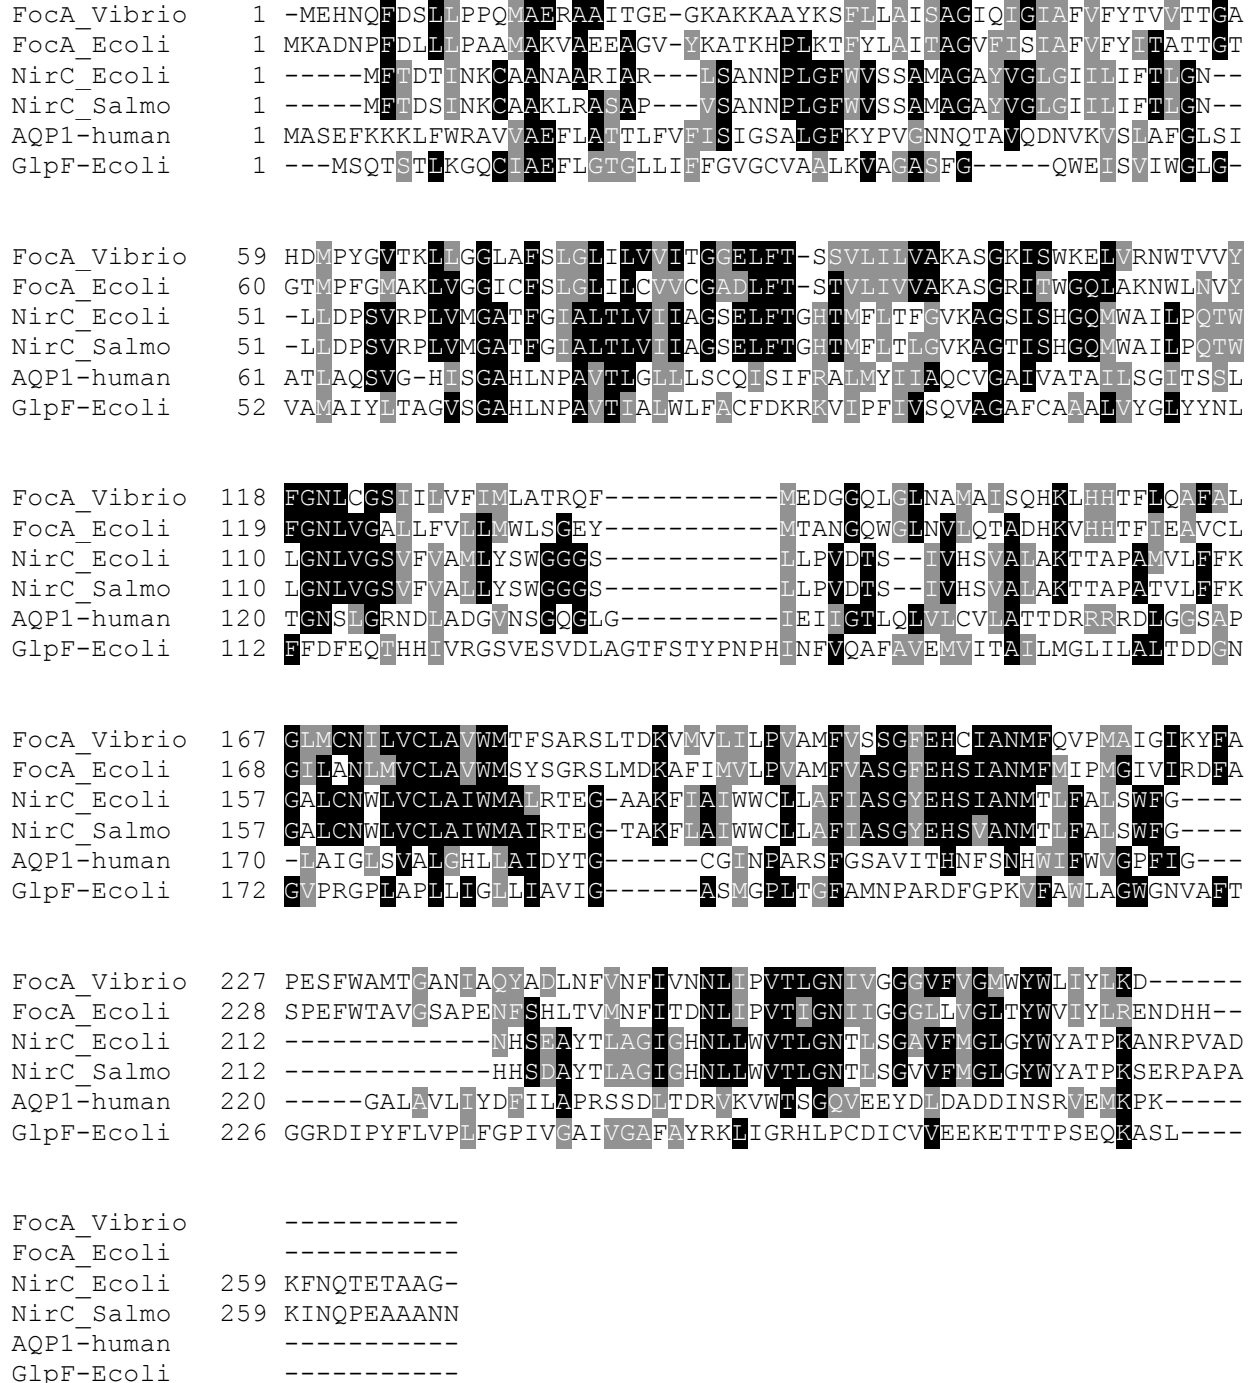

Fig. 1. Sequence alignment between the formate nitrite transport (FNT) protein family and the water/glycerol channel (AQP/GlpF) family.

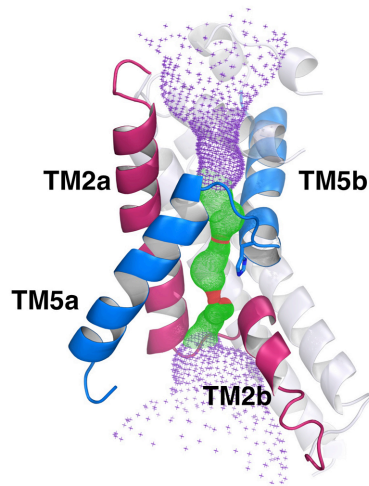

Fig. 2. Two broken transmembrane helices (TM2 and TM5) in Monomer A.

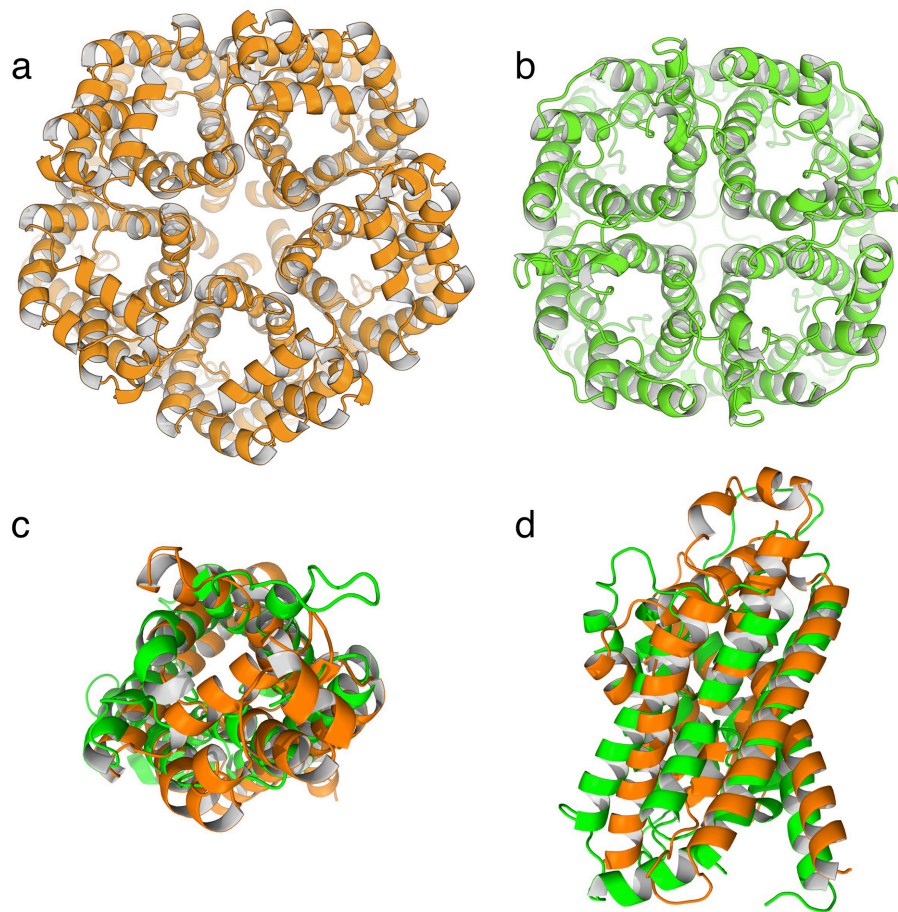

Fig. 3. Structural comparison between FocA and AQP1 water channel (PDB ID: 1J4N). **(a)** FocA pentamer. **(b)** AQP1 tetramer. **(c)** Superposition of FocA and AQP1 monomers, top view from the extracellular side. **(d)** Superposition of FocA and AQP1 monomers, side view from within the membrane. FocA molecules are colored orange, and AQP1 molecules green. The r.m.s.d for  $\alpha$ -carbon between FocA and AQP1 monomers is 7 Å for the 212 amino acids in the middle of the sequence.

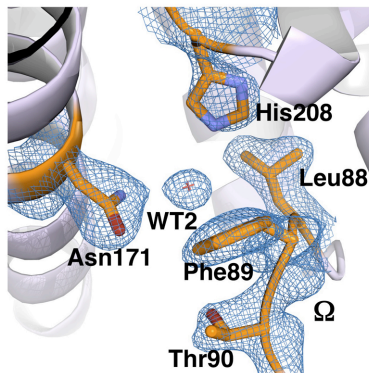

Fig. 4.  $2F_o-F_c$  map of Monomer E in the low-formate crystal form. The  $\Omega$  loop moves in the cytoplasmic direction along with the Thr90 residue. A water molecule (WT2) occupies the original position of Thr90 as in Monomer A and forms a hydrogen bond with His208.

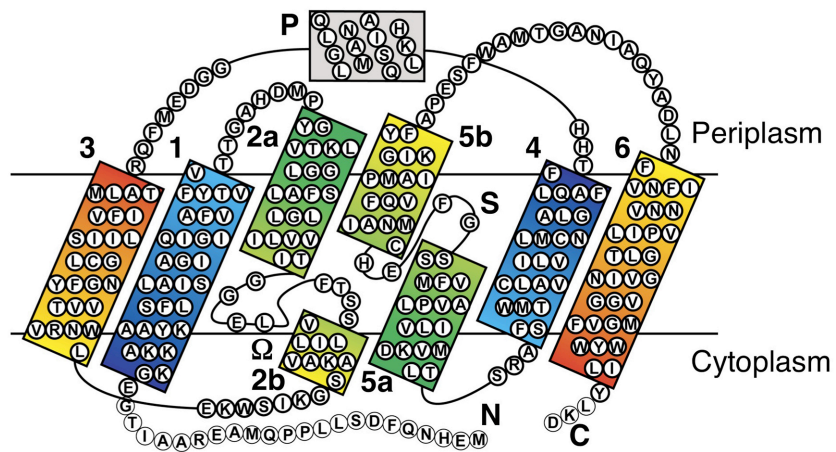

Fig. 5. Topology of Monomer E. Compared with Monomer A, TM2b in Monomer E is longer and a different segment in the sequence forms the helix. The color coding and helix numbering scheme are the same as for Figure 2d.

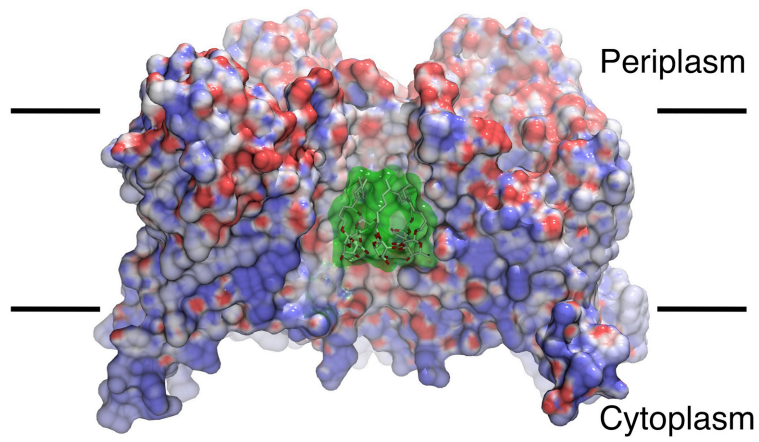

Fig. 6. Surface representation of the central pore around the fivefold axis of the pentamer. Five octylglucoside molecules (green) are found in the middle of the pore.

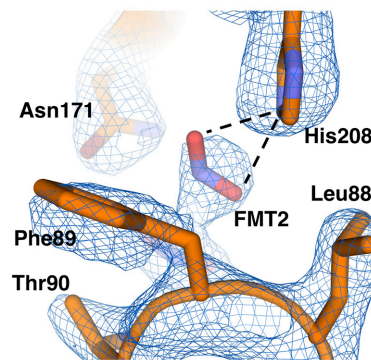

Fig. 7.  $2F_o-F_c$  map of Monomer E in the high-formate crystal form showing His208 forming a bidentate hydrogen bond with the two oxygen atoms of Formate 2 (FMT2).

Table 1. Structural variations among FocA monomers

| Monomer                                       | $\Omega$ Loop position | Formate/water in selectivity filter | TM2b position in sequence | Disordered residues ( $1\sigma$ ) | $\beta$ -OG found in cytoplasmic funnel | Involvement in crystal contact |
|-----------------------------------------------|------------------------|-------------------------------------|---------------------------|-----------------------------------|-----------------------------------------|--------------------------------|
| <b>Low-formate crystal structure (2.13 Å)</b> |                        |                                     |                           |                                   |                                         |                                |
| Monomer A                                     | UP                     | None                                | 90-94                     | 97-100                            | No                                      | Yes                            |
| Monomer B                                     | UP                     | None                                | 90-92                     | 93-107                            | Yes                                     | No                             |
| Monomer C                                     | UP                     | None                                | 90-93                     | 94-99                             | No                                      | No                             |
| Monomer D                                     | DOWN                   | 1 HOH                               | N/A                       | 93-104                            | Yes                                     | No                             |
| Monomer E                                     | DOWN                   | 1 HOH                               | 93-101                    | None                              | Yes                                     | Yes                            |
| <b>High-formate crystal structure (2.5 Å)</b> |                        |                                     |                           |                                   |                                         |                                |
| Monomer A                                     | UP                     | None                                | 90-95                     | None                              | No                                      | Yes                            |
| Monomer B                                     | UP                     | None                                | 90-93                     | 94-107                            | No                                      | No                             |
| Monomer C                                     | UP                     | None                                | 90-93                     | 94-104                            | No                                      | No                             |
| Monomer D                                     | DOWN                   | 1 FMT                               | N/A                       | 93-100                            | No                                      | No                             |
| Monomer E                                     | DOWN                   | 2 FMT                               | 93-101                    | None                              | Yes                                     | Yes                            |



Table 2. Protein-formate contact in Monomer E (high-formate)

| <b>Residue</b> | <b>Atom</b> | <b>Formate</b> | <b>Atom</b> | <b>Distance (Å)</b> |
|----------------|-------------|----------------|-------------|---------------------|
| <b>Leu88</b>   | CG          | <b>FMT2</b>    | O1          | 3.77                |
| <b>Phe89</b>   | CB          |                | C           | 3.43                |
|                | CB          |                | O1          | 3.43                |
|                | CB          |                | O2          | 3.56                |
|                | CD2         |                | C           | 3.29                |
|                | CD2         |                | O2          | 3.30                |
|                | CG          |                | C           | 3.71                |
|                | CG          |                | O2          | 3.60                |
| <b>Asn171</b>  | CG          |                | C           | 3.70                |
|                | CG          |                | O2          | 3.76                |
|                | ND2         |                | C           | 2.85                |
|                | ND2         |                | O1          | 3.75                |
|                | ND2         |                | O2          | 3.10                |
| <b>His208</b>  | CD2         |                | O2          | 3.44                |
|                | CE1         |                | C           | 3.72                |
|                | CE1         |                | O1          | 3.53                |
|                | CE1         |                | O2          | 3.12                |
|                | NE2         |                | C           | 3.20                |
|                | NE2         |                | O1          | 3.00                |
|                | NE2         |                | O2          | 2.76                |
| <b>Leu88</b>   | O           | <b>FMT1</b>    | C           | 3.53                |
|                | O           |                | O2          | 3.47                |
| <b>Thr90</b>   | CB          |                | C           | 3.78                |
|                | CG2         |                | C           | 3.70                |
|                | CG2         |                | O1          | 3.58                |
|                | OG1         |                | C           | 2.86                |
|                | OG1         |                | O1          | 3.29                |
|                | OG1         |                | O2          | 3.41                |
| <b>Asn171</b>  | CG          |                | O1          | 3.76                |
|                | ND2         |                | O1          | 3.42                |
|                | OD1         |                | O1          | 3.29                |
